# Supplementary material
Source: publisher figshare collection journal article supplement (https://sage.figshare.com/ndownloader/files/22214109)
Supplement: Supplementary file 1 [file 22214109]

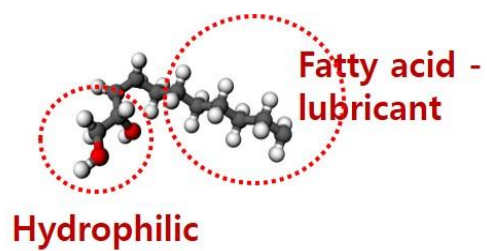

Fig. S1. A schematic diagram of multi-alcohol processing aids.

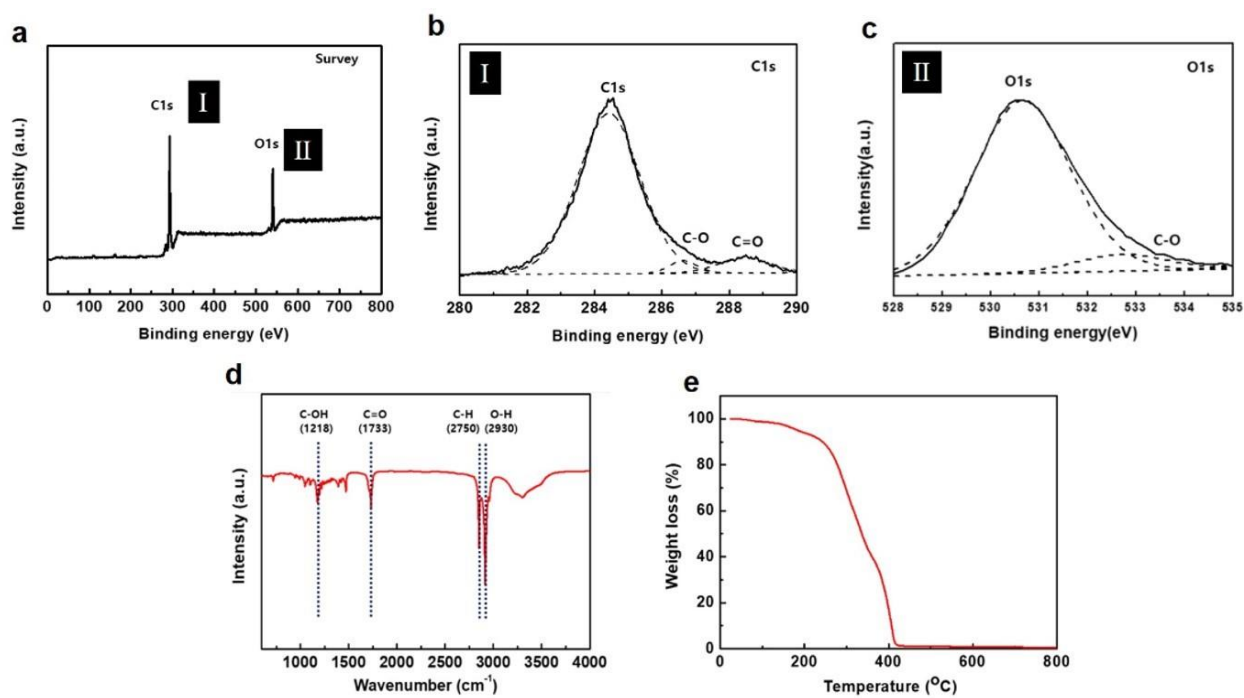

Fig S2. Characterization of as-prepared E-A-S.

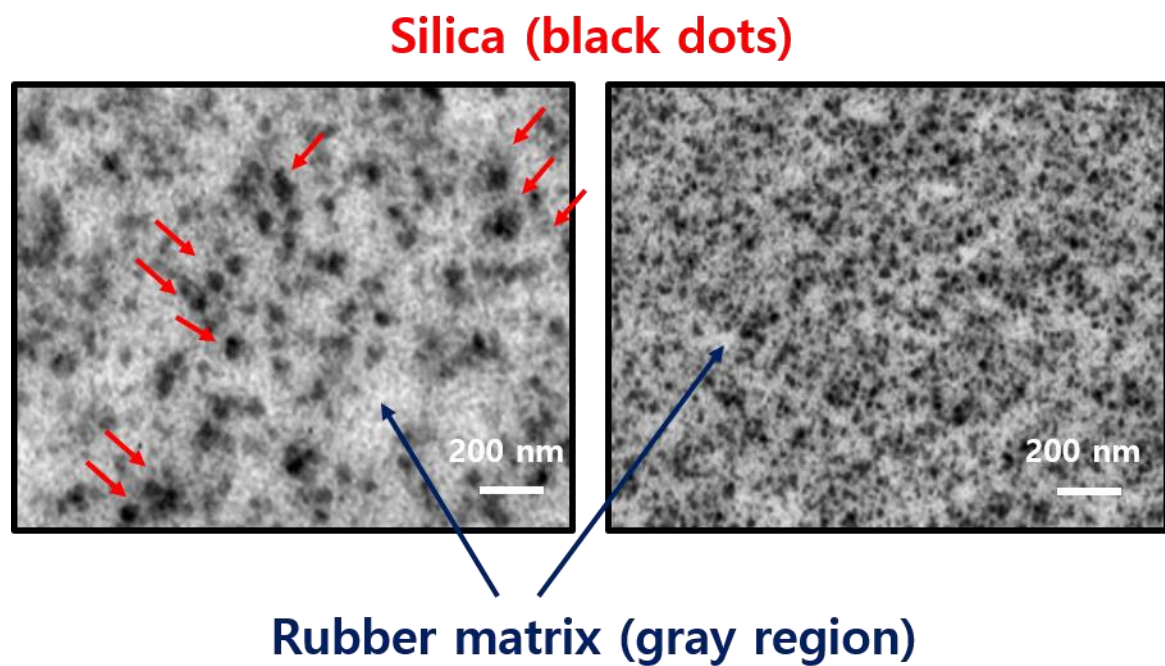

Fig S3. a) TEM images of rubber composites without processing aids. b) TEM images of rubber composites with M-A-S.

Table S1. Formulation of the rubber composites

Unit: phr

| Materials    | Control | Ca-S | Zn-S | E-S  | M-A-S | Injection Material                                | Injection Time               |
|--------------|---------|------|------|------|-------|---------------------------------------------------|------------------------------|
| SBR          | 60      | 60   | 60   | 60   | 60    | SBR<br>Silica<br>Master Batch<br>Chemical<br>Drop | 0<br>30<br>100<br>180<br>300 |
| Silica       | 40      | 40   | 40   | 40   | 40    |                                                   |                              |
| Stearic Acid | 1       | 1    | 1    | 1    | 1     |                                                   |                              |
| Ca-S         | -       | 2    | -    | -    | -     |                                                   |                              |
| Zn-S         | -       | -    | 2    | -    | -     |                                                   |                              |
| E-S          | -       | -    | -    | 2    | -     |                                                   |                              |
| E-A-S        | -       | -    | -    | -    | 2     |                                                   |                              |
| ZnO          | 2       | 2    | 2    | 2    | 2     |                                                   |                              |
| Sulfur       | 1.75    | 1.75 | 1.75 | 1.75 | 1.75  |                                                   |                              |
| TBBS         | 1       | 1    | 1    | 1    | 1     |                                                   |                              |

Table S2. Swelling and crossing density characteristics or rubber vulcanizates

| Materials                                      | Control     | Ca-S      | Zn-S      | E-S       | M-A-S      |
|------------------------------------------------|-------------|-----------|-----------|-----------|------------|
| Equilibrium swelling (%)                       | 127.1 ± 0.7 | 141.2±0.3 | 139.7±0.2 | 137.5±0.5 | 167.13±0.5 |
| Crosslinking density (mol/g·10 <sup>-4</sup> ) | 2.37±0.5    | 2.65±0.7  | 2.61±0.3  | 2.59±0.2  | 2.97±0.5   |

Table S3. Fatigue properties of rubber composites with different processing aids

| <b>Materials</b>     | <b>Control</b> | <b>Ca-S</b> | <b>Zn-S</b> | <b>E-S</b>  | <b>M-A-S</b> |
|----------------------|----------------|-------------|-------------|-------------|--------------|
| <b>3,000 cycles</b>  | <b>1.52</b>    | <b>1.54</b> | <b>1.53</b> | <b>1.45</b> | <b>1.44</b>  |
| <b>6,000 cycles</b>  | <b>2.18</b>    | <b>2.45</b> | <b>2.48</b> | <b>2.11</b> | <b>2.06</b>  |
| <b>10,000 cycles</b> | <b>3.15</b>    | <b>3.18</b> | <b>3.31</b> | <b>3.13</b> | <b>3.08</b>  |
| <b>dc/dn</b>         | <b>1.15</b>    | <b>1.16</b> | <b>1.25</b> | <b>1.14</b> | <b>1.02</b>  |
